# Supplementary material for: A receptor-like kinase gene (GbRLK) from Gossypium barbadense enhances salinity and drought-stress tolerance in Arabidopsis
Source: PubMed Central journal article supplement (PMC3750506; doi:10.1186/1471-2229-13-110), 2013-08-06
Supplement: 1471-2229-13-110-S1.pdf [file 1471-2229-13-110-S1.pdf]

**Additional table 1 The sequence of primers**

|                                     |                                   |
|-------------------------------------|-----------------------------------|
| GbRLK1-F                            | CGTCTAGATAGTGTGTTGCCAGAAACTC      |
| GbRLK1-R                            | ATCCCGGGTATTCTGGAAGCACATTA        |
| GbRLK2-F                            | CAATAGGCACTGCTAAAGGG              |
| GbRLK2-R                            | ACCACGATGTCATCAAAGG               |
| EF-F                                | AGACCACCAAGTACTACTGCAC            |
| EF-R                                | CCACCAATCTTGTACACATCC             |
| AtRuBisCo-F3                        | GCAAGTGTGGGTTCAAAGCTGGTG          |
| AtRuBisCo-R3                        | CCAGTTGAGGAGTTACTCGGAATGCTG       |
| GbRLK3-F                            | GCCAAGAATGGTTTCCAAGAT             |
| GbRLK3-R                            | ACATTTTGTATTCTGGAAG CACA          |
| NPTII-F                             | CACCCTATTCCC CTATCACTC            |
| NPTII-R                             | TACAACCCCATCCCCTCCCA              |
| pGbRLK1-F                           | CCGGAATCTTTTAATTAGGGTAGACAG       |
| pGbRLK1-R                           | GAAGATCTACCA TGTTTAGTGTATAGATTGAG |
| 35S-GbRLK                           | CACAATCCCACTATCCTTCG              |
| GUS-F                               | GGTGGGAAAGCGCGTTACAAG             |
| GUS-R                               | GTTTACGCGTGCTCCGCCA               |
| <b>The primers of sefa-PCR</b>      |                                   |
| SP1                                 | GCAAACACTATCGCTGCTTTCTC           |
| SP2                                 | CCTGGTTGAACGGCTTAGTGA             |
| SP3                                 | TGATCACCTGTCCCTGGNNNNNNAAGA       |
| <b>The primers of qRT-PCR (5—3)</b> |                                   |
| AtRD22F                             | GATTCGTCTTCCTCTGATCTG             |
| AtRD22R                             | TGGGTGTTAACGTTTACTCCG             |
| AtNHX1F                             | CCGTGCATTACTACTGGAGACAAT          |
| AtNHX1R                             | GTACAAAGCCACGACCTCCAA             |
| AtCAT1F                             | AGCGCTTTCGGAGCCTCGTG              |
| AtCAT1R                             | GGCCTCACGTTAAGACGAGTTGC           |
| AtSOS1F                             | TCGTTTCAGCCAAATCAGAAAGT           |
| AtSOS1R                             | TTTGCCTTGTGCTGCTTTCC              |
| AtRD22F                             | GATTCGTCTTCCTCTGATCTG             |
| AtRD22R                             | TGGGTGTTAACGTTTACTCCG             |
| AtCDS2F                             | TTAGTCTGACCACTGGAAACGC            |
| AtCDS2R                             | GGATGCTAAATAAACCAAAATGTA          |
| AtCDS1F                             | GTTGGTAGGGCTGTTGTTGTC             |
| AtCDS1R                             | TGGACCTCCTTATTACATCAA             |
| AtCCSF                              | GGGTAGTCCGATTTGCTCAG              |
| AtCCSR                              | GGTCTCCAATGGCTCTGTG               |
| AtRD20F                             | GTTTGGAAATGTAACCGAGGGA            |
| AtRD20R                             | AACTGAATAACAAGACGAAAGAAGC         |
| AtRD26F                             | GATGTGAAGTTACTGATGGGTGAA          |
| AtRD26R                             | GCGAGCCAAGTCACAAGGAG              |
