# Supplementary material for: A receptor-like kinase gene (GbRLK) from Gossypium barbadense enhances salinity and drought-stress tolerance in Arabidopsis
Source: PubMed Central journal article supplement (PMC3750506; doi:10.1186/1471-2229-13-110), 2013-08-06
Supplement: 1471-2229-13-110-S3.pdf [file 1471-2229-13-110-S3.pdf]

**Additional table 2 Cis-acting elements analysis of 5' flanking sequences in *GbRLK***

| <b>Classified of elements</b>                   | <b>Cis-acting elements</b> | <b>Sequence</b>                                                     | <b>Function</b>                                                                     |
|-------------------------------------------------|----------------------------|---------------------------------------------------------------------|-------------------------------------------------------------------------------------|
| <b>Elements related to stresses and hormone</b> | MYCCONSENSUSAT             | CATCTG                                                              | MYC recognition site found in the promoters of the dehydration responsive gene rd22 |
|                                                 | MYB1AT                     | AAACCA                                                              | MYB recognition site found in the promoters of the dehydration responsive gene rd22 |
|                                                 | 2SSEEDPROTBANAPA           | CAAACAC                                                             | Conserved in many storage protein gene promoters                                    |
|                                                 | ACGTATERD1                 | ACGT                                                                | cis-acting elements of erd1, function in induction by dehydration stress            |
|                                                 | AGMOTIFNTMYB2              | AGATCCAA                                                            | AG-motif found at -114 of the promoter of NtMyb2 gene                               |
|                                                 | ABRE                       | CACGTG                                                              | cis-acting element involved in the abscisic acid responsiveness                     |
|                                                 | TCA-element                | CCATCTTTTT                                                          | cis-acting element involved in salicylic acid responsiveness                        |
|                                                 | ARE                        | TGGTTT                                                              | cis-acting regulatory element essential for the anaerobic induction                 |
|                                                 | WBOXATNPR1                 | TTGAC                                                               | W-box found in promoter of Arabidopsis NPR1 gene                                    |
|                                                 | WBOXHVISO1                 | TGACT                                                               | SUSIBA2 bind to W-box element in barley iso1 promoter                               |
|                                                 | WBOXNTERF3                 | TGACY                                                               | W box found in the promoter region of ERF3 gene in tobacco;                         |
|                                                 | WRKY7IOS                   | TGAC                                                                | A core of TGAC-containing W-box                                                     |
|                                                 | MYBCORE                    | CNGTTR                                                              | Binding site for at least two plant MYB proteins ATMYB1 and ATMYB2                  |
|                                                 | RAV1AAT                    | CAACA                                                               | Binding consensus sequence of Arabidopsis transcription factor RAV1                 |
|                                                 | GT1CONSENSUS               | GRWAAW                                                              | Consensus GT-1 binding site in many light-regulated genes                           |
|                                                 | EBOXBNNAPA                 | CANNTG                                                              | E-box of napA storage-protein gene of Brassica napus                                |
| DOFCOREZM                                       | AAAG                       | Core site required for binding of Dof proteins in maize             |                                                                                     |
| TAAAGSTKST1                                     | TAAAG                      | TAAAG motif found in promoter of Solanum tuberosum (S.t.) KST1 gene |                                                                                     |
